# Supplementary material for: Novel peptides suppress VEGFR-3 activity and antagonize VEGFR-3-mediated oncogenic effects
Source: PubMed Central journal article supplement (PMC4116523; doi:10.18632/oncotarget.1709), 2014-05-24
Supplement: oncotarget-05-3823-s001.pdf [file oncotarget-05-3823-s001.pdf]

## SUPPLEMENTARY FIGURES AND METHODS

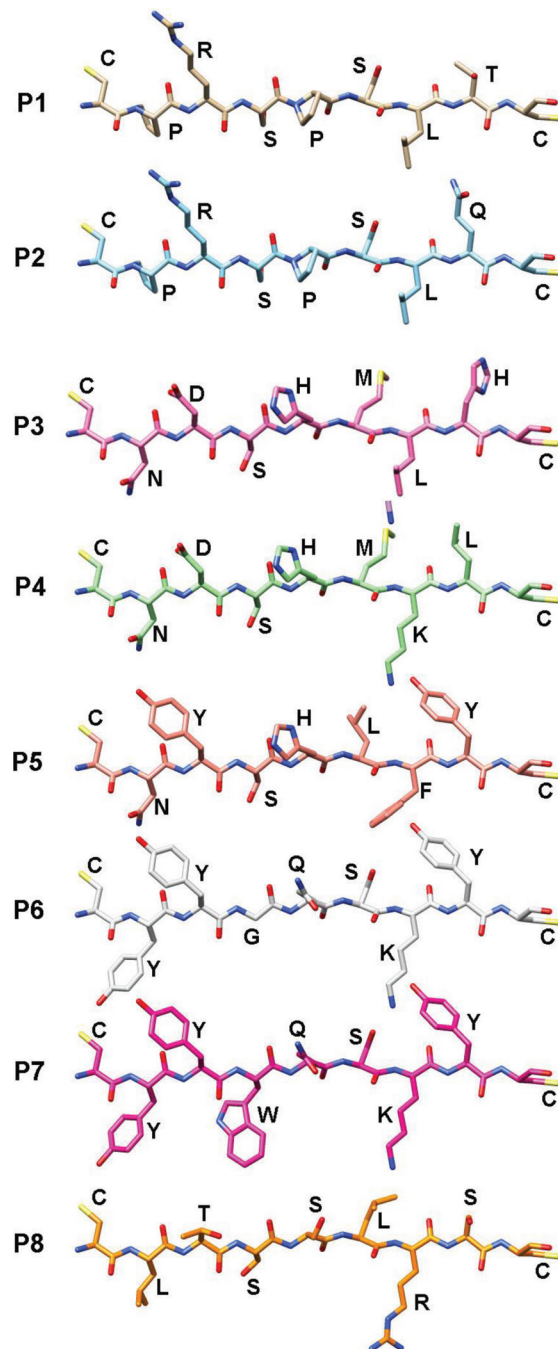

**Figure S1:** The peptide residues were shown as stick models with carbon atoms in different colors. From upper to lower, we presented structures of P1 to P8 peptides.

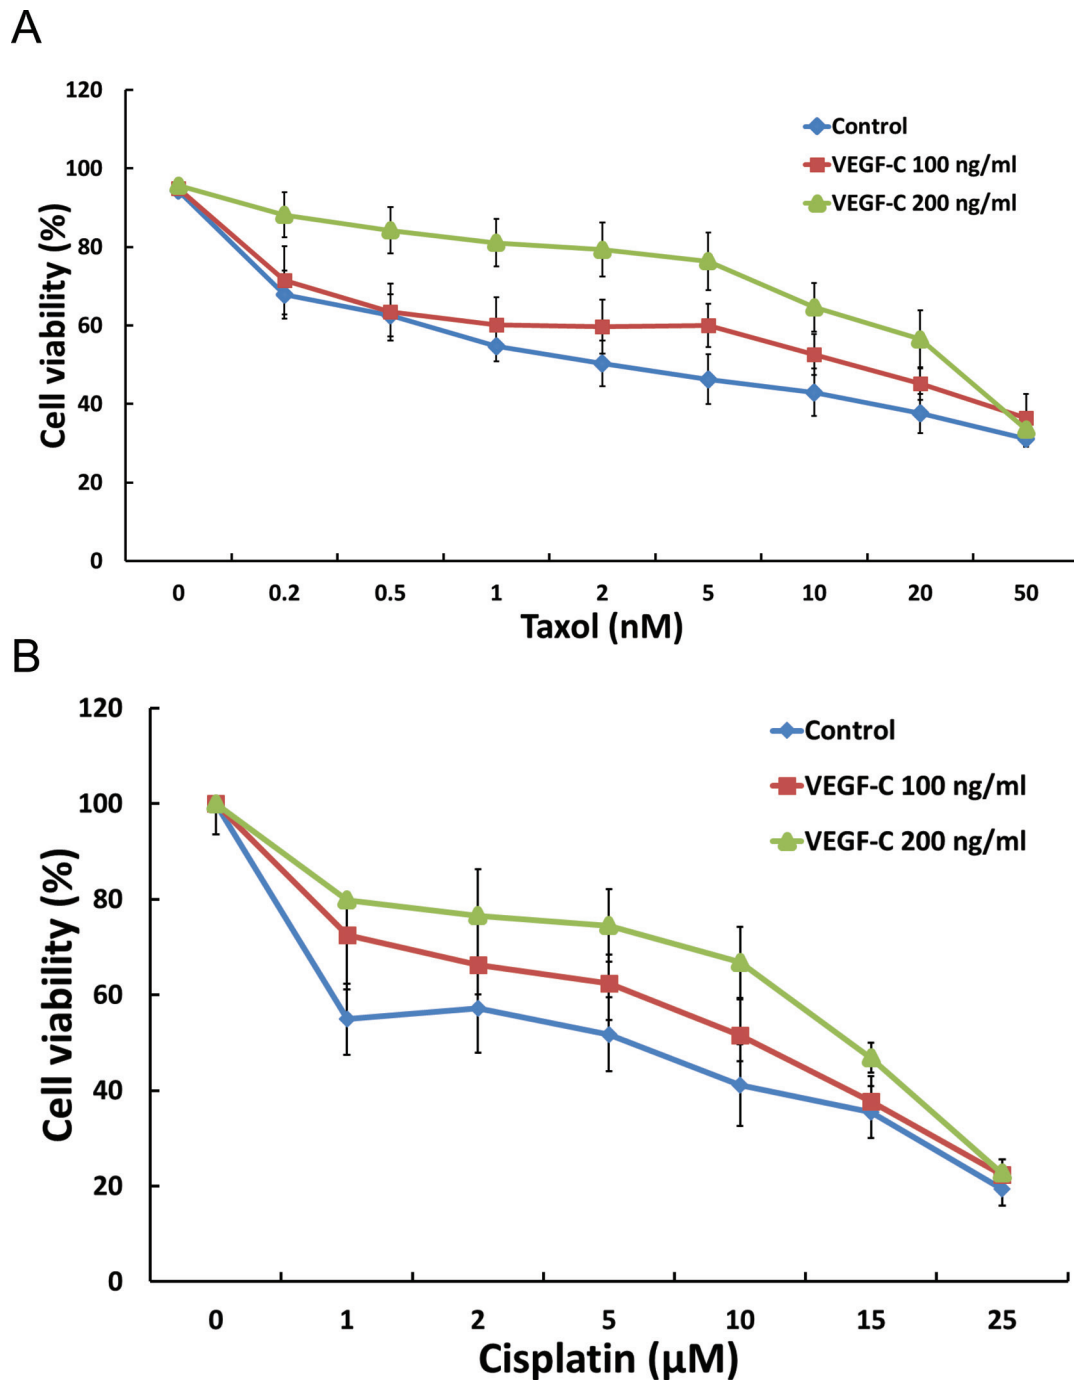

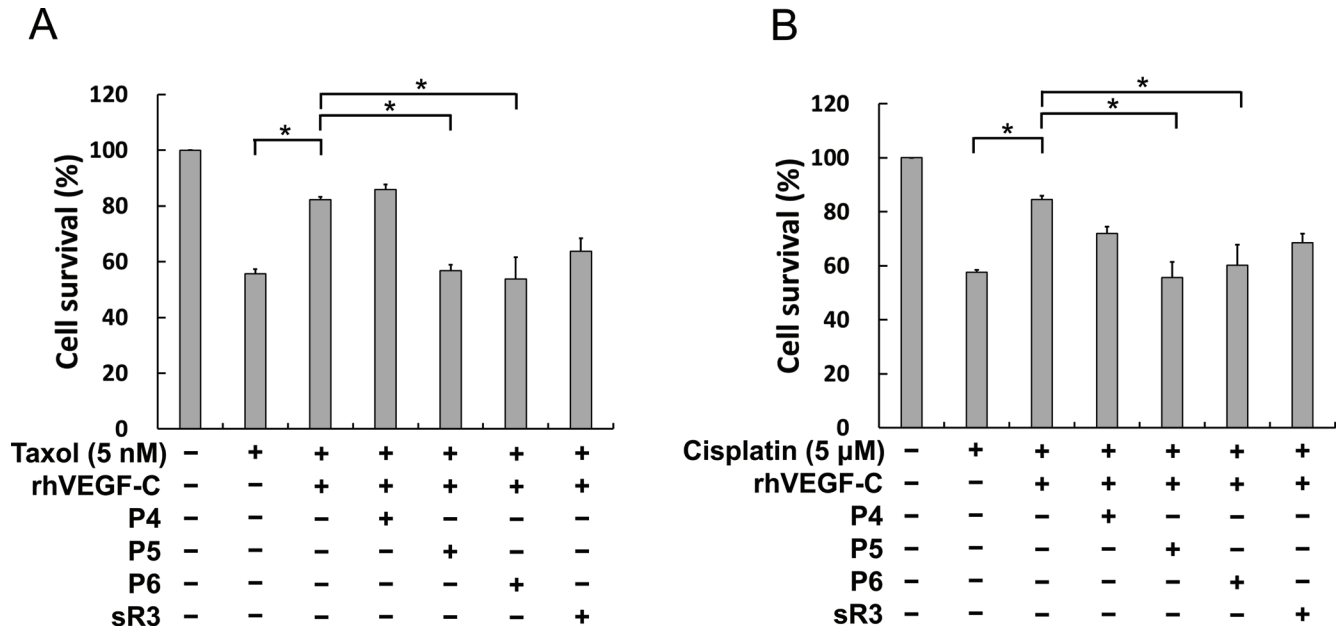

**Figure S3: P5 and P6 peptides inhibit VEGF-C-induced drug resistance by MTT assay.** Taxol (A) and cisplatin (B) were treated with the indicated peptides and rhVEGF-C in A549 cells. The cell survival rates were measured by MTT assay. Columns, mean of three independent experiments; bars, SD. \*,  $p < 0.05$  statistically significant decrease compared with the corresponding control value.

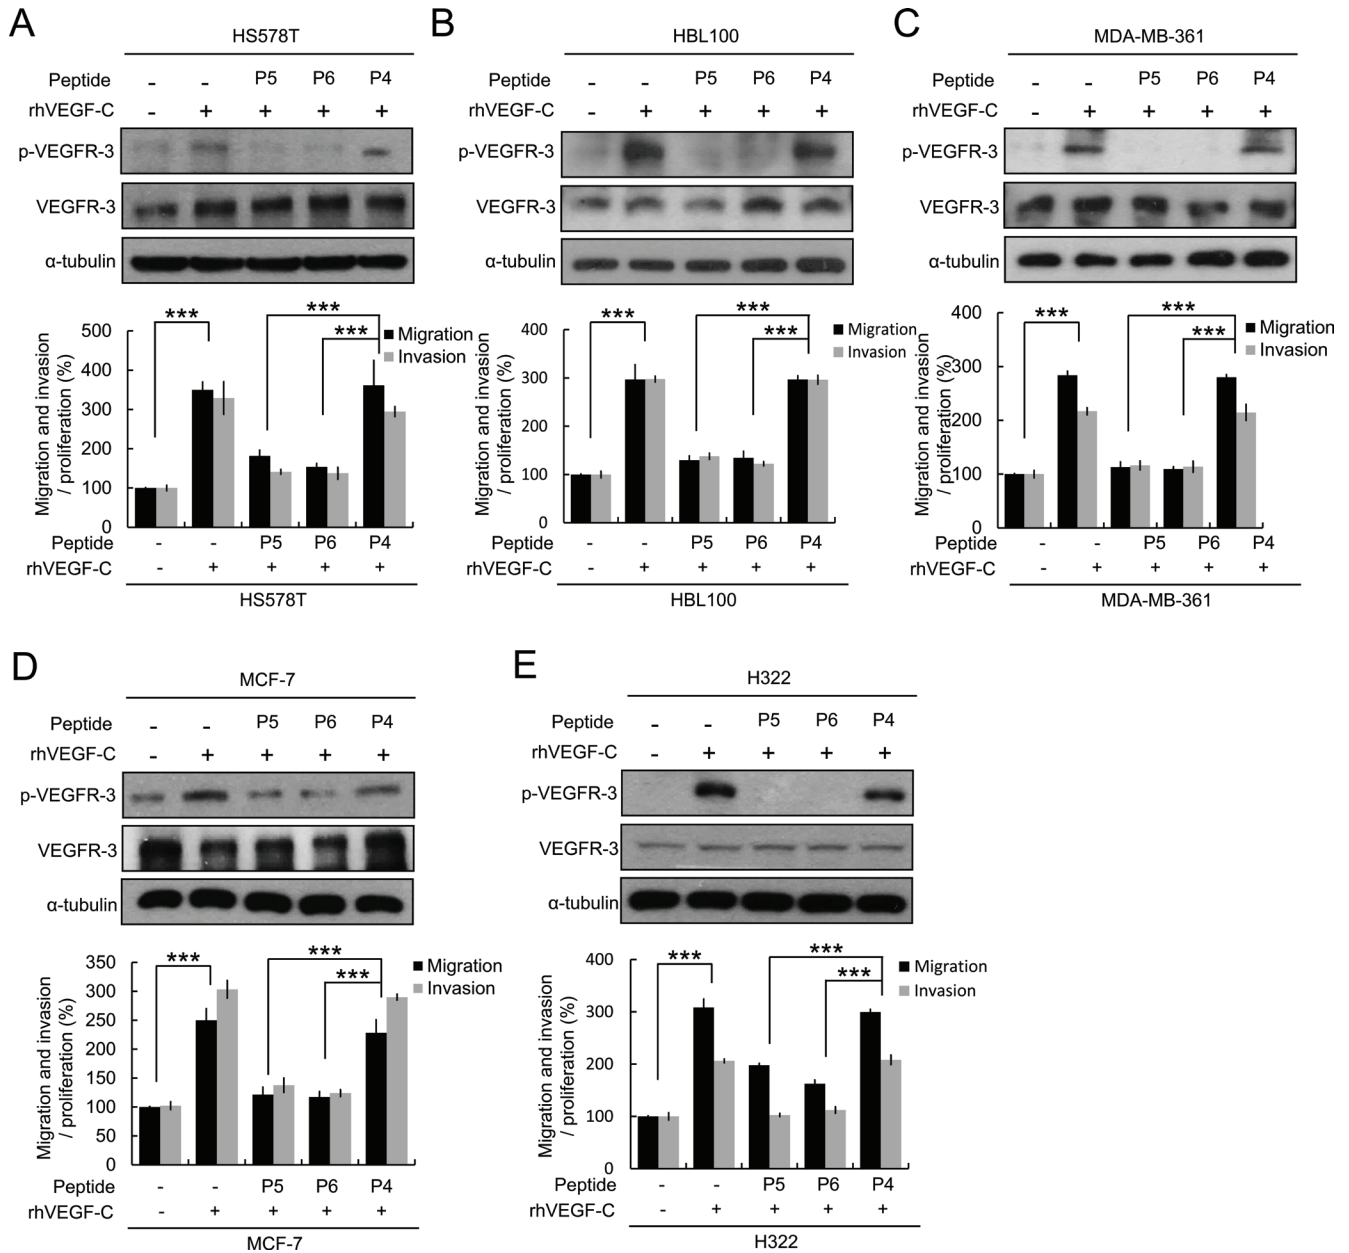

**Figure S4: P5 and P6 peptides inhibit VEGF-C/VEGFR-3 signaling and decrease cancer cells migration and invasion.** Effects of control (P4), P5 and P6 peptides on VEGF-C-induced VEGFR-3 activation was analyze by western blot analysis (upper) and the ability of migration and invasion (lower) in HS578T (A), HBL100 (B), MDA-MB-361 (C), MCF-7 (D) and H322 (E) cells. Columns, mean of three independent experiments; bars, SD. \*\*\*,  $p < 0.001$  statistically significant decrease compared with the corresponding control value.

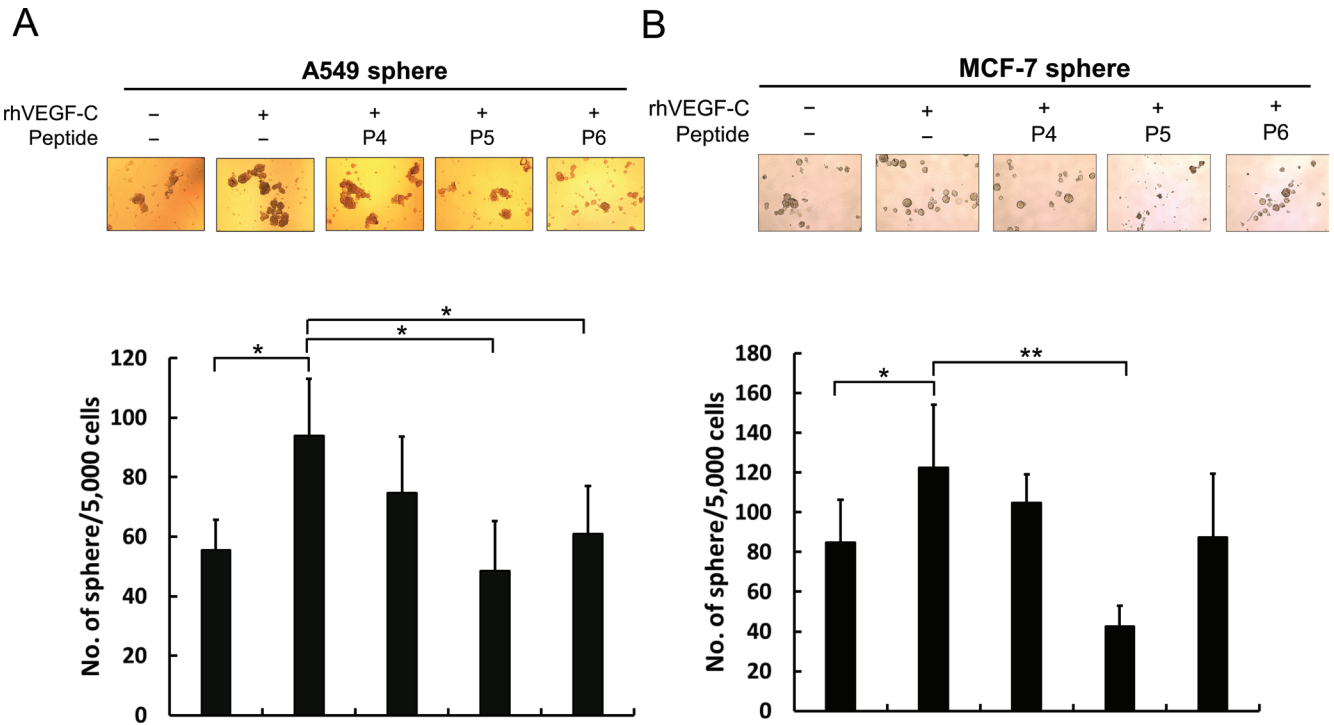

**Figure S5: P5 and P6 peptides decrease sphere formation of cancer cells.** Effects of control (P4), P5 and P6 peptides on VEGF-C-induced tumor initiating cells (TICs) formation. Sphere-forming assay was performed in A549 (A) and MCF-7 (B) cells treated with indicated peptides and rhVEGF-C. Columns, mean of three independent experiments; bars, SD. \*,  $p < 0.05$ ; \*\*,  $p < 0.01$  statistically significant decrease compared with the corresponding control value.

### A549 sphere

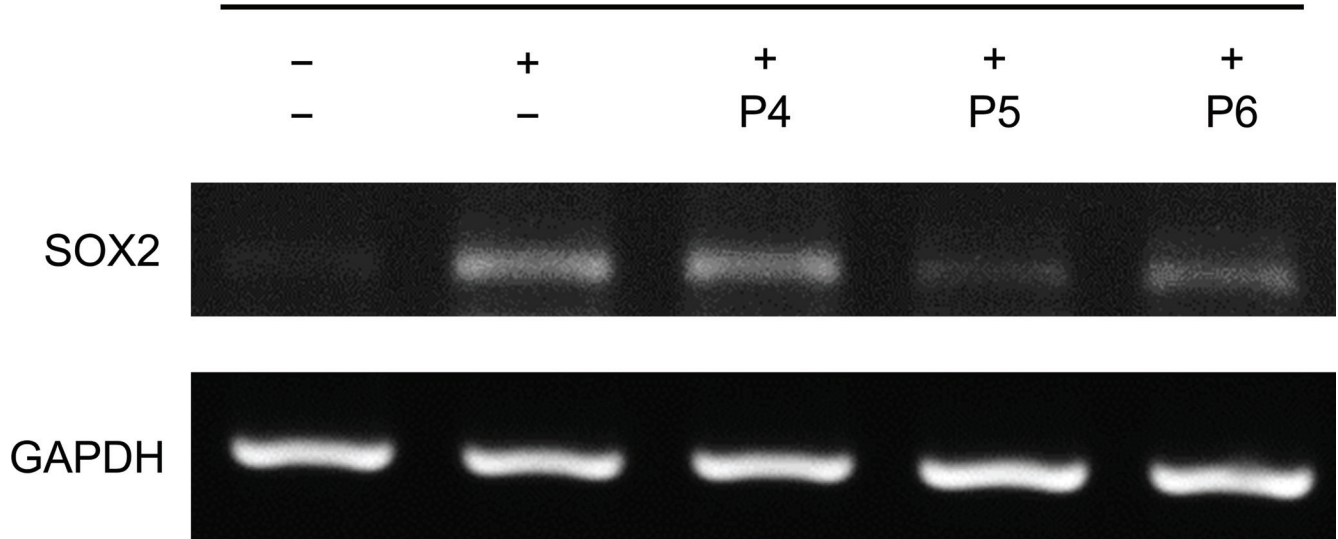

**Figure S6: P5 and P6 peptides significantly decrease VEGF-C-induced cancer stem cell marker.** Effects of P5 and P6 peptides on mRNA expression of SOX2. Total RNA were harvested for analysis of SOX2 mRNA by RT-PCR.
